# Supplementary material
Source: PubMed Central journal article supplement (PMC4813763)
Supplement: NIHMS54938-supplement-Supplementary_figures_1-8_and_supplementary_tables_1-3.pdf [file NIHMS54938-supplement-Supplementary_figures_1-8_and_supplementary_tables_1-3.pdf]

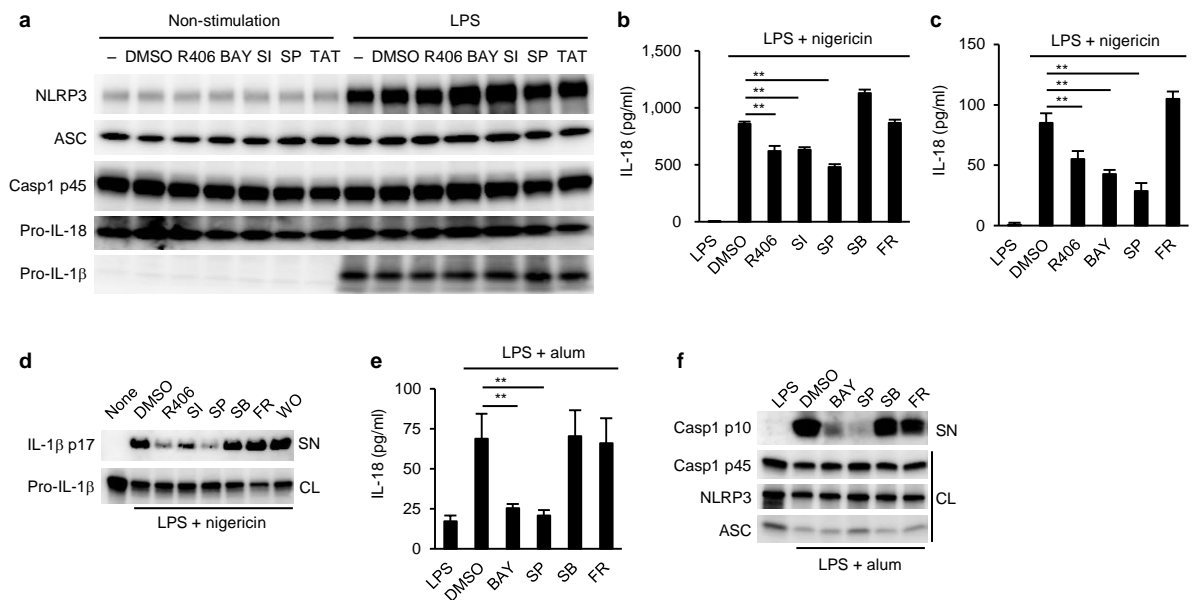

**Supplementary Figure 1** Inhibition of Syk or JNK do not affect the expression of inflammasome molecules. **(a,d,f)** Immunoblotting of inflammasome molecules or **(b,c,e)** ELISA of IL-18 in peritoneal macrophages **(a,d-f)**, BMDM **(b)**, or U937 cells **(c)** primed with LPS for 4 h **(a)**, followed by stimulation with nigericin for 90 min **(b-d)**, or alum for 6 h **(e,f)**. The indicated kinase inhibitors were added to the cultures 1 h before stimulation. CL, cell lysates; SN, supernatants. Data are shown as the means  $\pm$  s.d. of triplicate samples of one experiment representative of three independent experiments. Data were analyzed by one-way ANOVA with Bonferroni multiple comparison test **(b,c,e)**. \*  $P < 0.01$  and \*\*  $P < 0.001$ .

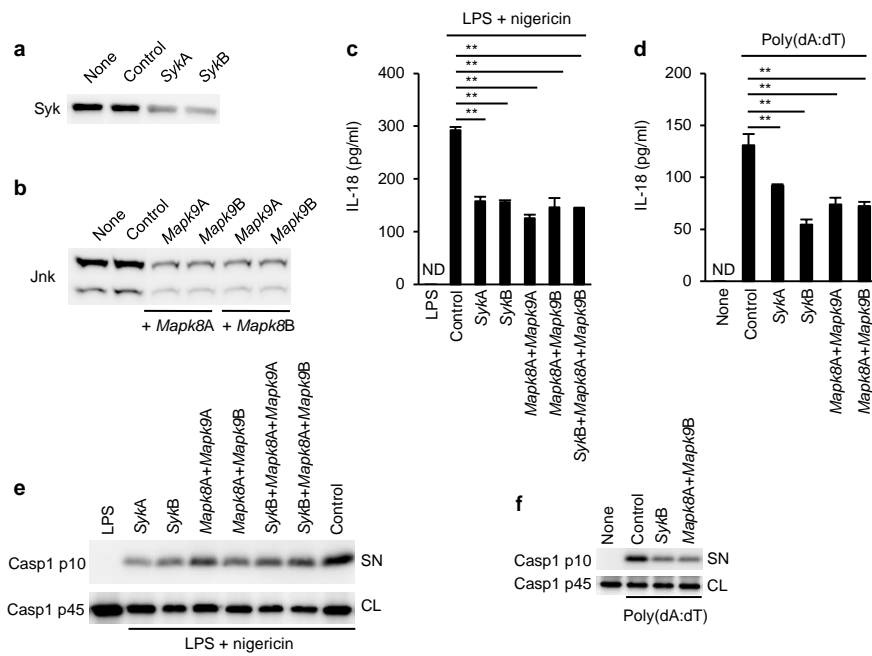

**Supplementary Figure 2** Knockdown of *Syk* or *Mapk8, Mapk9* in primary macrophages. (a,b,e,f) Immunoblotting of caspase-1 or (c,d) ELISA of IL-18 in peritoneal macrophages unprimed (a,b), primed with LPS for 4 h, followed by stimulation with nigericin for 90 min (c,e), or unprimed macrophages stimulated with poly(dA:dT) for 3 h (d,f). Macrophages were transfected with siRNAs for 48 h. Control, negative control siRNA; CL, cell lysates; SN, supernatants; ND, not detected. Data are shown as the means  $\pm$  s.d. of triplicate samples of one experiment representative of three independent experiments. Data were analyzed by one-way ANOVA with Bonferroni multiple comparison test (c,d). \*  $P < 0.001$ .

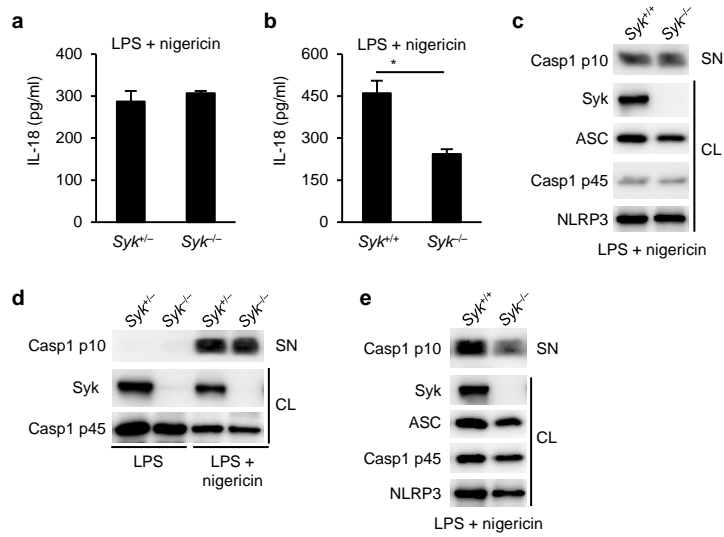

**Supplementary Figure 3** Syk is not required for NLRP3 inflammasome activation in dendritic cells. **(a,b)** ELISA of IL-18 or **(c,d)** immunoblotting of inflammasome molecules in BMDCs **(a,c,d)** or BMDMs **(b,e)** primed with LPS for 4 h, followed by stimulation with nigericin for 90 min. BMDMs were prepared using L-cell conditioned medium. CL, cell lysates; SN, supernatants. Data are shown as the means  $\pm$  s.d. of triplicate samples of one experiment representative of two independent experiments. Data were analyzed by two-tailed unpaired *t* test with Welch's correction (a,b). \*  $P < 0.001$ .

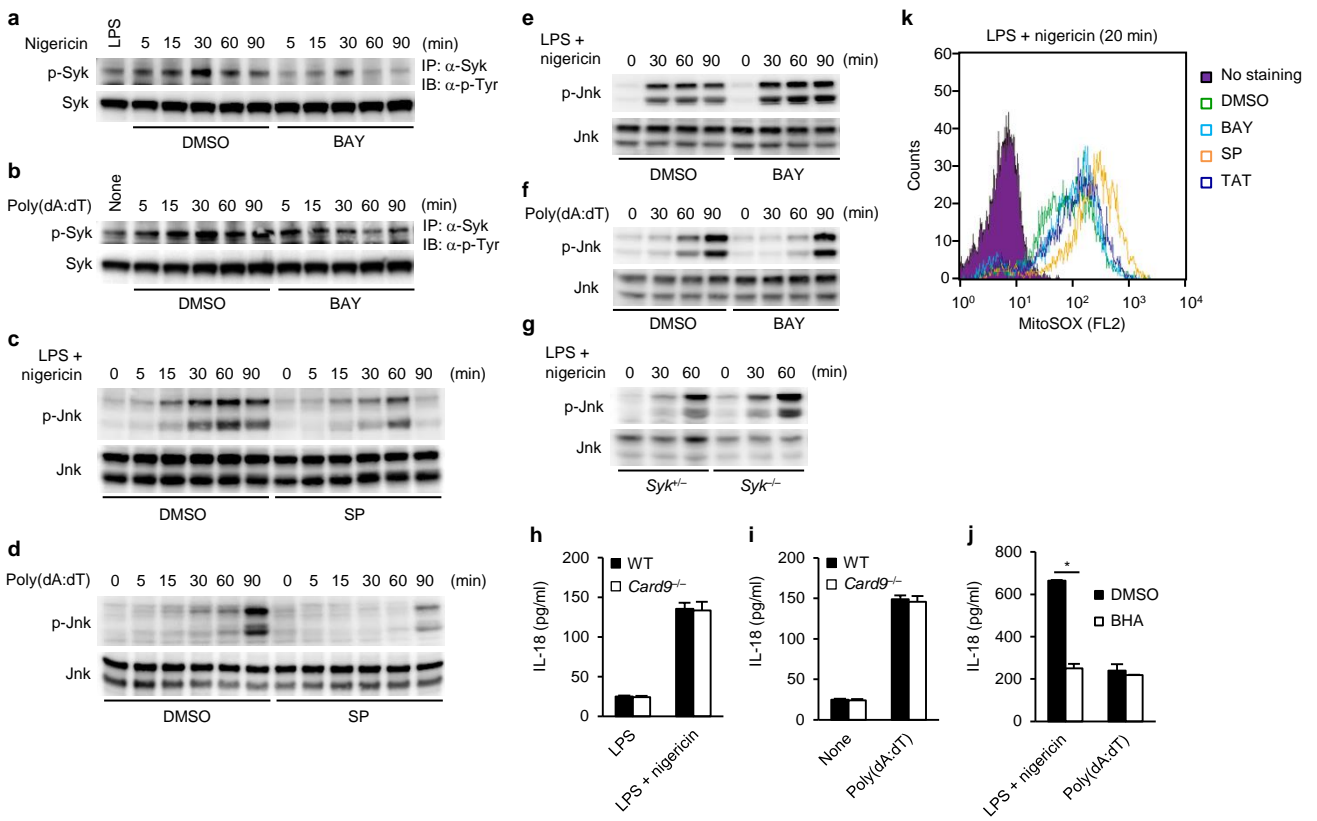

**Supplementary Figure 4** Implication that Syk contributes to inflammasome activity through an unknown mechanism. (a–g) Immunoblotting of kinases, (h–j) ELISA of IL-18, or (k) FACS analysis of mitochondrial ROS in peritoneal macrophages primed with LPS for 4 h, followed by stimulation with nigericin for the indicated times (a,c,e,g,h,j,k), or unprimed macrophages stimulated with poly(dA:dT) for 3 h (b,d,f,i,j). The kinase inhibitors and BHA (25  $\mu$ M) were added to the cultures 1 h before stimulation (a–e,j,k). The cells were incubated with nigericin for 20 min in the presence of MitoSOX (5  $\mu$ M) and analyzed on a flow cytometer (k). Data are shown as the means  $\pm$  s.d. of triplicate samples of one experiment. Data shown in e,f,h–k are representative of three independent experiments and those in a–d,g are representative of two independent experiments. Data were analyzed by two-tailed unpaired *t* test with Welch’s correction (h–j). \*  $P < 0.001$ .

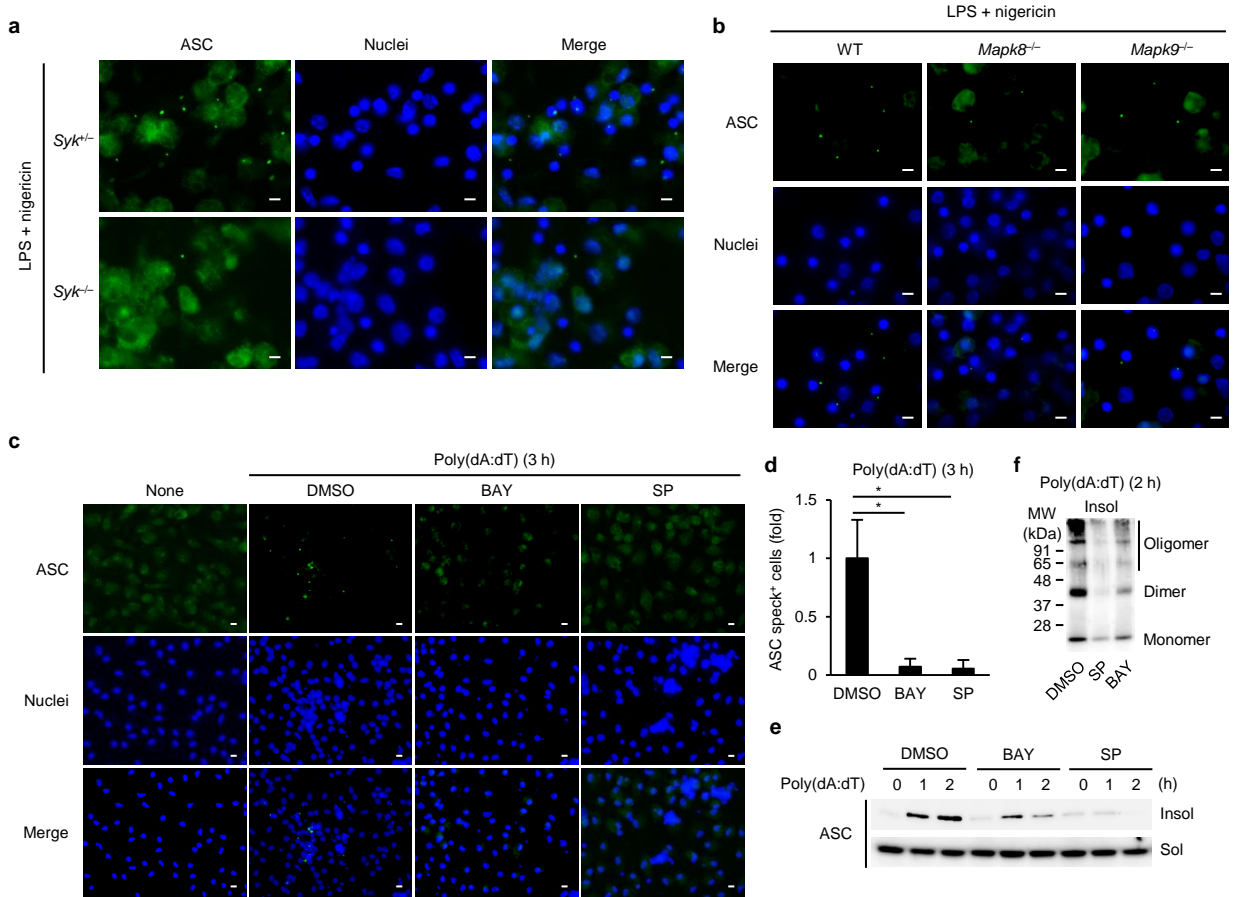

**Supplementary Figure 5** Requirement of Syk and JNK for ASC speck formation induced by poly(dA:dT). (**a-d**) ASC staining or (**e,f**) immunoblotting of ASC in peritoneal macrophages primed with LPS for 4 h, followed by stimulation with nigericin for 90 min (**a,b**), or unprimed macrophages stimulated with poly(dA:dT) for the indicated times (**c-f**). The kinase inhibitors were added to the cultures 1 h before stimulation (**c-f**). ASC is shown in green, nuclei in blue (**a-c**). The number of ASC speck-positive cell was counted and normalized to that of the solvent control (**d**). The Triton-insoluble fraction was treated with DSS before immunoblotting (**f**). Data are shown as the means  $\pm$  s.d. of triplicate samples of one experiment. Data shown in **e-f** are representative of three independent experiments and those in **a,b** are representative of two independent experiments. Data were analyzed by Kruskal-Wallis test with Dunn's multiple comparison test (**d**). Scale bar, 10  $\mu$ m. \*  $P < 0.05$ .

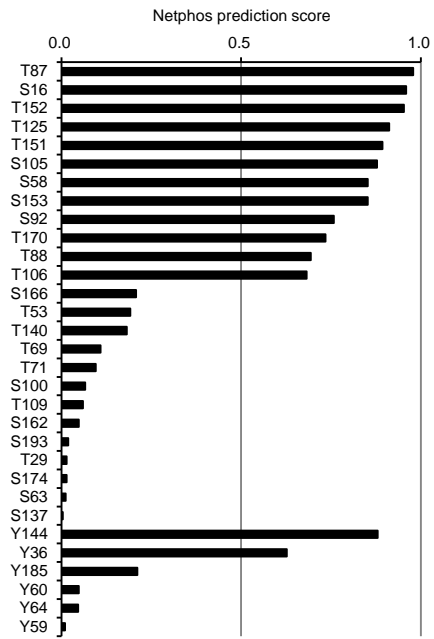

**Supplementary Figure 6** Prediction of phosphorylation sites in mouse ASC. Possible phosphorylation sites in the amino acid sequence of mouse ASC were predicted by using the online program NetPhos 2.0. The threshold is 0.5.

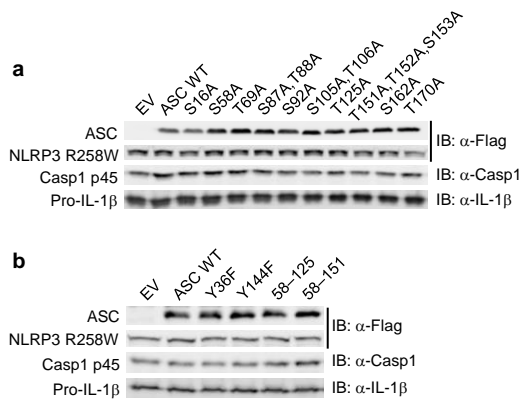

**Supplementary Figure 7** Reconstitution of inflammasome system in HEK293 cells.  
**(a, b)** Immunoblotting of inflammasome molecules in reconstituted HEK293 cells transfected as described in Fig. 5a,b.

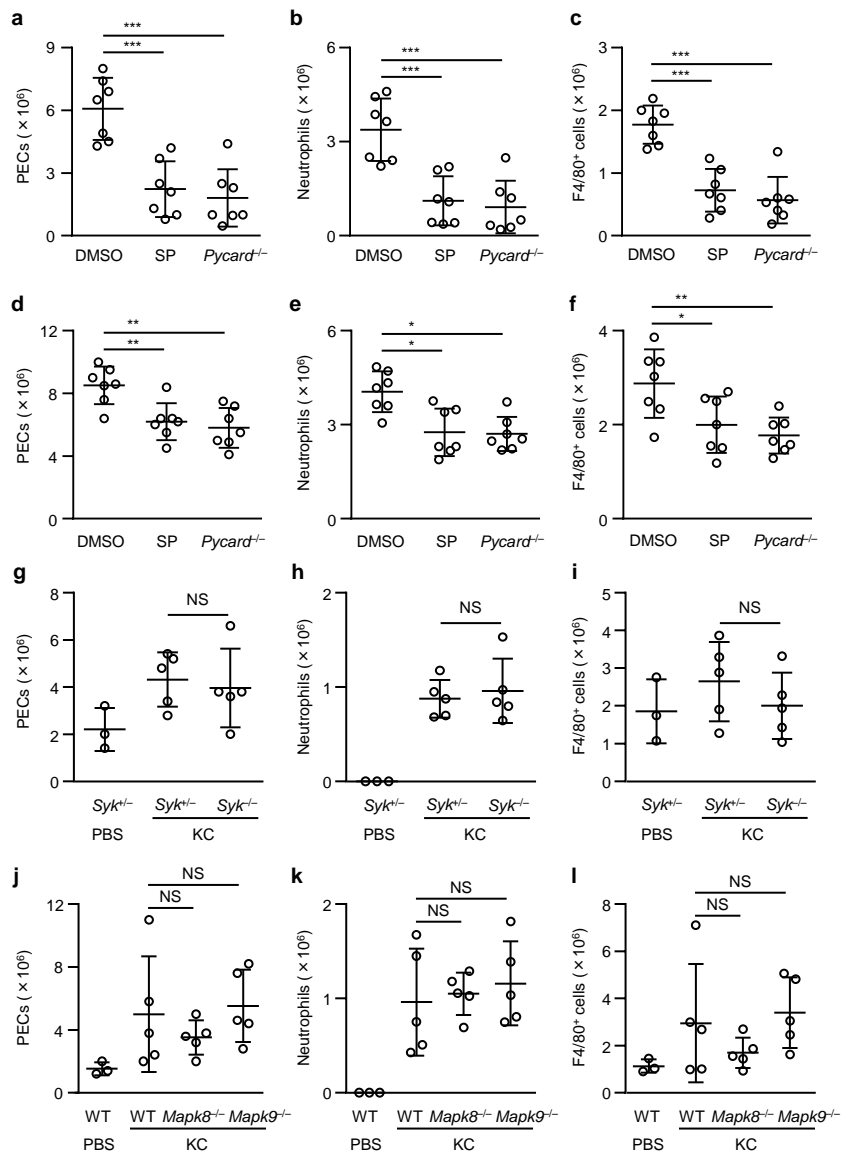

**Supplementary Figure 8** Involvement of ASC and JNK in inflammatory responses to MSU and Alum *in vivo*. (**a–f**) Infiltration of inflammatory cells in the peritoneal cavity induced by intraperitoneal injection of MSU (**a–c**) or alum (**d–f**) at 6 h after injection. Two hours before and 30 min later administration of the irritants, the mice were intraperitoneally treated with JNK inhibitor. (**g–l**) Infiltration of inflammatory cells in the peritoneal cavity induced by intraperitoneal injection of KC or PBS at 1.5 h after injection. Absolute numbers of PECs (**a,d,g,j**), Gr-1<sup>+</sup> F4/80<sup>+</sup> neutrophils (**b,e,h,k**), and F4/80<sup>+</sup> monocytes and macrophages (**c,f,i,l**) in the peritoneum were then determined. Data are shown as dots, and the bars indicate the means  $\pm$  s.d. (n = 7 for **a–f**; n = 5 for **g–l**; n = 3 for PBS control in **g–l**). Data were analyzed by one-way ANOVA with Bonferroni (**a–d,f**) or Tukey-Kramer (**g–l**) multiple comparison test, or Kruskal-Wallis test with Dunn's multiple comparison test (**e**). NS, no significant difference. \*  $P < 0.05$ , \*\*  $P < 0.01$  and \*\*\*  $P < 0.001$ .



Supplementary Table 1 List of kinase inhibitors

| Inhibitor                     | Abbreviation | Target | Final conc. |
|-------------------------------|--------------|--------|-------------|
| R406                          | R406         | Syk    | 1 $\mu$ M   |
| BAY 61-3606                   | BAY          | Syk    | 10 $\mu$ M  |
| Syk inhibitor I               | SI           | Syk    | 1 $\mu$ M   |
| PP2                           | PP2          | Src    | 5 $\mu$ M   |
| SP600125                      | SP           | JNK    | 40 $\mu$ M  |
| TAT-TI-JIP <sub>153-163</sub> | TAT          | JNK    | 40 $\mu$ M  |
| SB203580                      | SB           | p38    | 10 $\mu$ M  |
| FR180204                      | FR           | Erk    | 10 $\mu$ M  |
| Wortmannin                    | WO           | PI3K   | 10 nM       |

Supplementary Table 2 Prediction of kinase-specific phosphorylation sites in ASC from different species

| Tested kinase | Target protein | Code | Position | Peptide          | Score |
|---------------|----------------|------|----------|------------------|-------|
| Syk family    | Mouse ASC      | Y    | 144      | SVLTEGQYQAVRAET  | 1.092 |
| JNK family    | Mouse ASC      | T    | 29       | KFKMKLLTVQLREGY  | 1.312 |
| JNK family    | Mouse ASC      | T    | 87       | ELAEQLQTTKEESGA  | 1.625 |
| JNK family    | Mouse ASC      | T    | 88       | LAEQLQTTKEESGAV  | 1.479 |
| JNK family    | Mouse ASC      | S    | 100      | GAVAAAASVPAQSTA  | 1.333 |
| JNK family    | Mouse ASC      | S    | 105      | AASVPAQSTARTGHF  | 1.688 |
| JNK family    | Mouse ASC      | S    | 153      | AVRAETTSQDKMRKL  | 1.458 |
| JNK family    | Mouse ASC      | S    | 193      | LVMDLEQS*****    | 1.438 |
| Syk family    | Human ASC      | Y    | 146      | KVLTDEQYQAVRAEP  | 1.723 |
| JNK family    | Human ASC      | Y    | 187      | ALRESQSYLVEDLERY | 1.308 |
| JNK family    | Human ASC      | S    | 106      | GIQAPPQSAAKPGLHA | 2.500 |
| JNK family    | Human ASC      | T    | 154      | QAVRAEPTNPSKMRK  | 1.333 |
| JNK family    | Human ASC      | T    | 166      | MRKLFSFTPAWNWTC  | 2.146 |
| JNK family    | Human ASC      | S    | 195      | LVEDLERS*****    | 1.542 |
| Syk family    | Zebrafish ASC  | Y    | 152      | KVITNEDYCTIRNKE  | 1.892 |
| JNK family    | Zebrafish ASC  | S    | 40       | QEPRVTKSAIEKLKD  | 1.354 |
| JNK family    | Zebrafish ASC  | T    | 160      | CTIRNKETPQKKMRE  | 5.104 |
| JNK family    | Zebrafish ASC  | T    | 170      | KKMRELLTGPITCAG  | 1.521 |

Supplementary Table 3 List of primers

| Primer No. | Primer used for      | Direction | Sequence                            |
|------------|----------------------|-----------|-------------------------------------|
| 1          | mNLRP3 cloning       | Fw        | CCTGCGGCCGCAACGAGTGTCCGTTGCAAG      |
| 2          | mNLRP3 cloning       | Rv        | CCTGGTACCCTACCAGGAAATCTCGAAGACTA    |
| 3          | mSyk cloning         | Fw        | AGCTTGCGGCCGCGGGAAGTGCTGTGGACAGCGCC |
| 4          | mSyk cloning         | Rv        | CTAGAGTCGACTTAGTTAACCACGTCGTAGTAG   |
| 5          | mJNK1 cloning        | Fw        | CAACTATCGATGAGCAGAAGCAAACGTGACAAC   |
| 6          | mJNK1 cloning        | Rv        | CGCACGGATCCTCATTGCTGCACCTGTGCTAAAGG |
| 7          | mJNK2 cloning        | Fw        | CAACTATCGATGAGTGACAGTAAAAGCGATGG    |
| 8          | mJNK2 cloning        | Rv        | CGCACGGATCCTCACCGGCAGCCTTCCAGGGGTCC |
| 9          | NLRP3-R258W mutant   | Fw        | CCACTGCTGGGAGGTGAGCCTCAG            |
| 10         | NLRP3-R258W mutant   | Rv        | TCACCTCCCAGCAGTGGATAAAGAA           |
| 11         | ASC-S16A mutant      | Fw        | AACTTGGCCGGGGATGAACTCAAAAAG         |
| 12         | ASC-S16A mutant      | Rv        | ATCCCCGGCCAAGTTTTCAAGAGC            |
| 13         | ASC-S58A mutant      | Fw        | CTTGTCGCCTACTATCTGGAGTCGTATG        |
| 14         | ASC-S58A mutant      | Rv        | ATAGTAGGCGACAAGTTTGTTCAGTGAG        |
| 15         | ASC-T69A mutant      | Fw        | GAGCTCGCCATGACTGTGCTTAGAG           |
| 16         | ASC-T69A mutant      | Rv        | AGTCATGGCGAGCTCCAAGCCATAC           |
| 17         | ASC-S87A/T88A mutant | Fw        | CTGCAAGCCGCTAAAGAAGAGTCTGGA         |
| 18         | ASC-S87A/T88A mutant | Rv        | CTTCTTTAGCGGCTTGCAGCTGCTCAGC        |

| Primer No. | Primer used for              | Direction | Sequence                        |
|------------|------------------------------|-----------|---------------------------------|
| 19         | ASC-S92A mutant              | Fw        | GAAGAGGCCGGAGCTGTGGCAGCTG       |
| 20         | ASC-S92A mutant              | Rv        | CAGCTCCGGCCTCTTCTTTAGTCGT       |
| 21         | ASC-S105A/T106A mutant       | Fw        | CTCAGGCCGCAGCCAGAACAGGACAC      |
| 22         | ASC-S105A/T106A mutant       | Rv        | CTGGCTGCGGCCTGAGCAGGGACACTG     |
| 23         | ASC-T125A mutant             | Fw        | AGGGTCGCAGAAGTGGACGGAGTGCTG     |
| 24         | ASC-T125A mutant             | Rv        | CACTTCTGCGACCCTGGCAATGAGTGC     |
| 25         | ASC-T151A/T152A/S153A mutant | Fw        | AGAGGCCGCCGCCAAGACAAGATGAGGAAG  |
| 26         | ASC-T151A/T152A/S153A mutant | Rv        | CTTGGGCGGCGGCCTCTGCACGAACTGCCTG |
| 27         | ASC-S162A mutant             | Fw        | AACTTGCCCGGGATGAACTCAAAAAG      |
| 28         | ASC-S162A mutant             | Rv        | ATCCCCGGCCAAGTTTTCAAGAGC        |
| 29         | ASC-T170A mutant             | Fw        | AACCTGGCCTGCAAGGACTCCCTC        |
| 30         | ASC-T170A mutant             | Rv        | CTTGCAGGCCAGGTTCCAGGATGG        |
| 31         | ASC-Y36F mutant              | Fw        | GAAGGCTTTGGGCGCATCCCACGC        |
| 32         | ASC-Y36F mutant              | Rv        | GCGCCCAAAGCCTTCTCGCAGTTG        |
| 33         | ASC-Y144F mutant             | Fw        | GGACAGTTCCAGGCAGTTCGTGCA        |
| 34         | ASC-Y144F mutant             | Rv        | TGCCTGGAAGTGTCTTCAGTCAG         |
| 35         | Deletion of FLAG-tag         | Fw        | CTACCATGGCGGCCGCGAATTCATCG      |
| 36         | Deletion of FLAG-tag         | Rv        | GCGGCCGCCATGGTAGATCAATTCTGA     |
